# Supplementary material for: FOXO1 forkhead domain mutants in B-cell lymphoma lack transcriptional activity
Source: PubMed Central journal article supplement (PMC8789783; doi:10.1038/s41598-022-05334-4), 2022-01-25

## **Supplementary Information**

### **FOXO1 forkhead domain mutants in B-cell lymphoma lack transcriptional activity**

**Ariane Sablon<sup>\*1</sup>, Emeline Bollaert<sup>\*1</sup>, Constance Pirson<sup>1</sup>, Amélie I. Velghe<sup>1</sup>, Jean-Baptiste Demoulin<sup>1</sup>**

<sup>1</sup> de Duve Institute, Université Catholique de Louvain, Brussels, Belgium.

<sup>\*</sup>These authors contributed equally to this work.

**Supplementary Figure S1. FOXO1 forkhead domain mutations in B-cell malignancies.** Mutations reported in the literature, in COSMIC and in cBioPortal (December 6, 2021). Studied variants are highlighted in gray. CLL: chronic lymphocytic leukemia; DLBCL: diffuse large B-cell lymphoma; BL: Burkitt lymphoma; CNSL: central nervous system lymphoma; FL: follicular lymphoma; PTL: post-transplant lymphoproliferative disorder; MZL: marginal zone lymphoma.

| CDS mutations       | AA mutations        | Lymphomas                                                       | Counts                | References                                                                 |
|---------------------|---------------------|-----------------------------------------------------------------|-----------------------|----------------------------------------------------------------------------|
| c.455G>A            | p.S152N             | CLL                                                             | 1                     | COSM7208266                                                                |
| c.456C>A            | p.S152R             | DLBCL (2), BL (2), CNSL (1)<br>DLBCL                            | 5<br>1                | COSM9213941<br>Trinh et al, 2013                                           |
| c.457A>G            | p.S153G             | DLBCL                                                           | 1                     | Reddy et al, 2017                                                          |
| c.459C>G            | p.S153R             | DLBCL                                                           | 1                     | Trinh et al, 2013                                                          |
| c.486C>G            | p.N162K             | DLBCL<br>DLBCL                                                  | 1<br>1                | COSM8438787<br>cBioPortal TCGA-VB-A8QN                                     |
| c.496_588del        | p.A166_Y196del      | DLBCL                                                           | 1                     | COSM9863544                                                                |
| c.496G>A            | p.A166T             | DLBCL                                                           | 1                     | Reddy et al, 2017                                                          |
| c.497C>T            | p.A166V             | DLBCL<br>DLBCL<br>DLBCL                                         | 4<br>2<br>1           | COSM9866300<br>Trinh et al, 2013<br>Reddy et al, 2017                      |
| c.497C>G            | p.A166G             | DLBCL                                                           | 1                     | Trinh et al, 2013                                                          |
| c.502C>G            | p.L168V             | DLBCL                                                           | 1                     | Trinh et al, 2013                                                          |
| c.511A>G            | p.K171E             | DLBCL                                                           | 1                     | Trinh et al, 2013                                                          |
| c.514G>A            | p.A172T             | DLBCL                                                           | 1                     | Reddy et al, 2017                                                          |
| ns                  | p.I173M             | BL                                                              | 1                     | Zhou et al, 2019                                                           |
| c.524G>A            | p.S175N             | DLBCL                                                           | 1                     | COSM6954168                                                                |
| c.524G>C            | p.S175T             | DLBCL                                                           | 1                     | Dubois et al, 2016                                                         |
| ns                  | p.I175R             | BL                                                              | 1                     | Zhou et al, 2019                                                           |
| c.536_547del        | p.K179_L183delinsM  | DLBCL                                                           | 1                     | COSM9863413                                                                |
| c.540_626delinsA    | p.L181Efs*7         | DLBCL                                                           | 1                     | COSM9862360                                                                |
| c.548T>C            | p.L183P             | DLBCL                                                           | 1                     | Trinh et al, 2013                                                          |
| c.557T>C            | p.I186T             | DLBCL                                                           | 1                     | Trinh et al, 2013                                                          |
| ns                  | p.I186S             | BL                                                              | 1                     | Zhou et al, 2019                                                           |
| c.567G>A            | p.W189*             | FL                                                              | 1                     | COSM1316591                                                                |
| c.568A>G            | p.M190V             | DLBCL                                                           | 1                     | Reddy et al, 2017                                                          |
| c.578G>A            | p.S193N             | DLBCL                                                           | 1                     | COSM7338533                                                                |
| c.579C>A            | p.S193R             | FL                                                              | 1                     | COSM220649 (Morin et al, 2011)                                             |
| c.581T>C            | p.V194A             | BL                                                              | 2                     | COSM9213939                                                                |
| c.588C>G            | p.Y196*             | DLBCL                                                           | 1                     | COSM9867401                                                                |
| c.592A>T            | p.K198*             | DLBCL                                                           | 1                     | COSM9868106                                                                |
| c.595G>C            | p.D199H             | PTLD                                                            | 1                     | COSM7338768                                                                |
| c.598A>T            | p.K200*             | PTLD                                                            | 1                     | COSM7338760                                                                |
| c.608G>A            | p.S203N             | FL                                                              | 1                     | COSM220643 (Morin et al, 2011)                                             |
| c.609C>A            | p.S203R             | PTLD                                                            | 1                     | COSM7338756                                                                |
| c.611_614delinsGCTA | p.N204_S205delinsSY | DLBCL                                                           | 1                     | COSM6986743                                                                |
| c.612C>G            | p.N204K             | MZL                                                             | 1                     | COSM9264648                                                                |
| c.614G>A            | p.S205N             | DLBCL<br>DLBCL                                                  | 3<br>1                | COSM5651478 (Morin et al, 2016)<br>Trinh et al, 2013                       |
| c.614G>C            | p.S205T             | DLBCL (1), PTL (1)<br>SU-DHL5 cell line<br>DLBCL<br>DLBCL<br>BL | 2<br>1<br>1<br>1<br>1 | COSM7338758<br>Trinh et al, 2013<br>Dubois et al, 2016<br>Zhou et al, 2019 |
| ns                  | p.S206L             | BL                                                              | 1                     | Zhou et al, 2019                                                           |
| ns                  | p.A207P             | BL                                                              | 1                     | Zhou et al, 2019                                                           |
| c.648T>A            | p.N216K             | DLBCL<br>FL                                                     | 1<br>1                | COSM4170502<br>Pasqualucci et al, 2014                                     |

References:

- Morin, R.D., et al., Frequent mutation of histone-modifying genes in non-Hodgkin lymphoma. *Nature*, 2011. 476(7360): p. 298-303.
- Trinh, D.L., et al., Analysis of FOXO1 mutations in diffuse large B-cell lymphoma. *Blood*, 2013. 121(18): p. 3666-74.
- Pasqualucci, L., et al., Genetics of follicular lymphoma transformation. *Cell Rep*, 2014. 6(1): p. 130-40.
- Dubois, S., et al., Next-Generation Sequencing in Diffuse Large B-Cell Lymphoma Highlights Molecular Divergence and Therapeutic Opportunities: a LYSA Study. *Clin Cancer Res*, 2016. 22(12): p. 2919-28.
- Morin, R.D., et al., Genetic Landscapes of Relapsed and Refractory Diffuse Large B-Cell Lymphomas. *Clin Cancer Res*, 2016. 22(9): p. 2290-300.
- Reddy, A., et al., Genetic and Functional Drivers of Diffuse Large B Cell Lymphoma. *Cell*, 2017. 171(2): p. 481-494 e15.
- Zhou, P., et al., Sporadic and endemic Burkitt lymphoma have frequent FOXO1 mutations but distinct hotspots in the AKT recognition motif. *Blood Adv*, 2019. 3(14): p. 2118-2127.

**Supplementary Figure S2. Original images of Figure 1C, 3A, 3B.**  
Unprocessed images of EMSA and western blots.

Original images of Figure 1C.

*EMSA. Image detected with a phosphorimager screen overnight.*

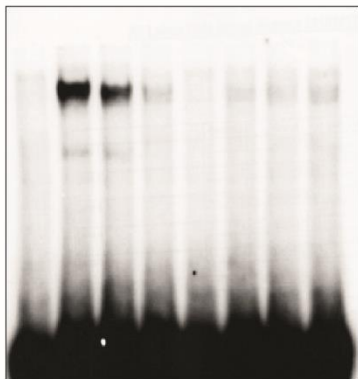

*Western blot of FOXO1 expression. Signal detected with "Amersham Hyperfilm ECL". The whole piece of film is shown.*

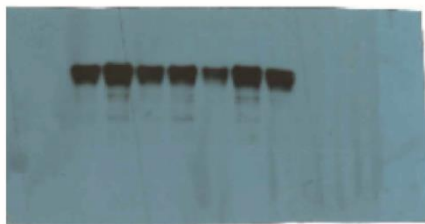

Original images of Figure 3A.

*Western blots of phospho- and total FOXO1. Signal detected with FUSION Solo S (Vilber).*

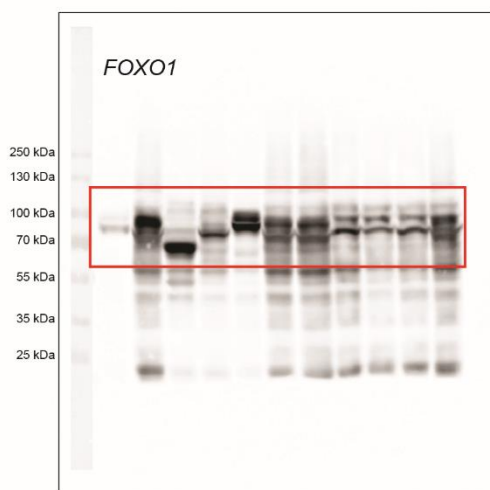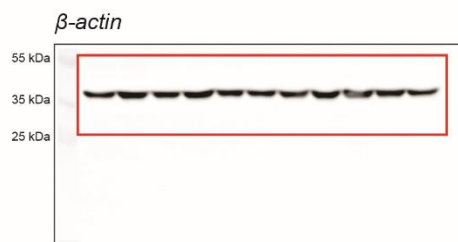

*pFOXO1 (Thr24)*

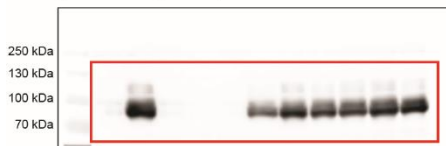

*pFOXO1 (Ser256)*

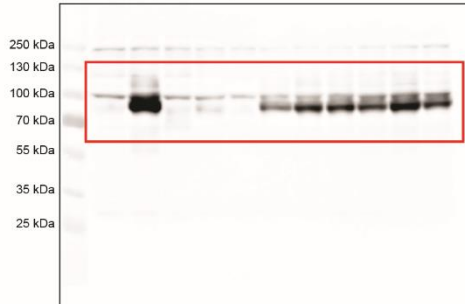

*pFOXO1 (Ser319)*

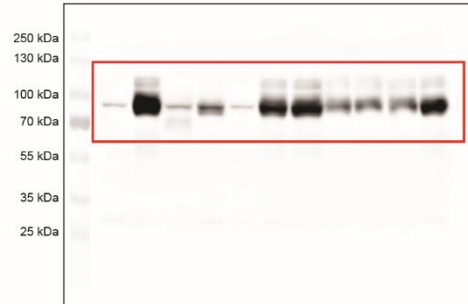

Original images of Figure 3B.

Western blot of phospho- and total FOXO1. Signal detected with FUSION Solo S (Vilber).

FOXO1 (low exposure)

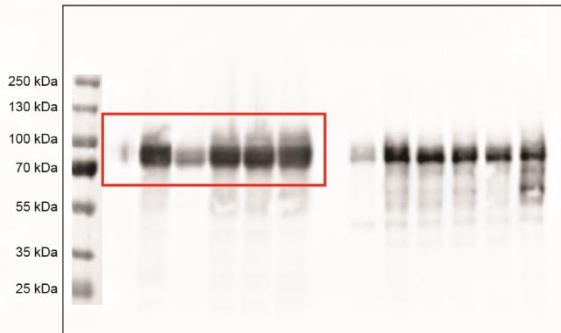

FOXO1 (high exposure)

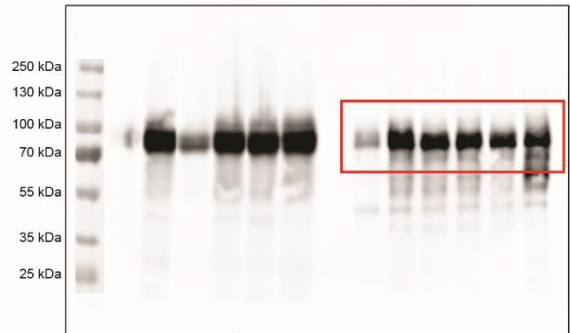

ATG7 (low exposure)

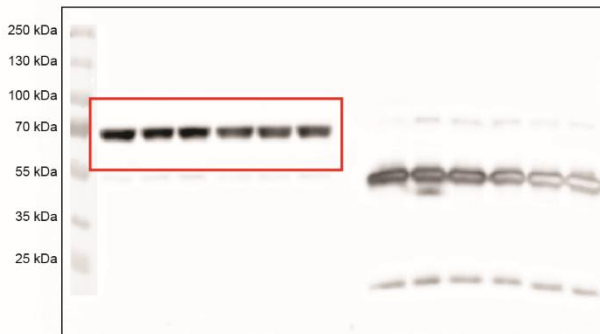

ATG7 (high exposure)

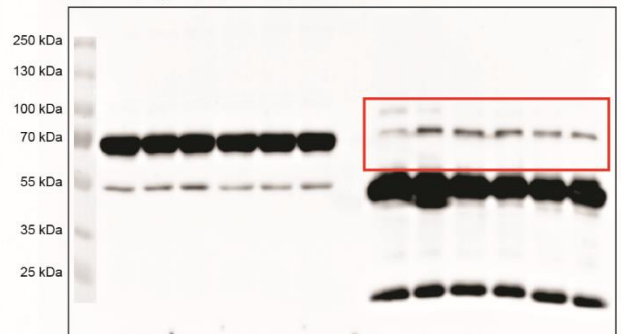

Supplement: 41598_2022_5334_MOESM1_ESM.pdf [file 41598_2022_5334_MOESM1_ESM.pdf]
